# Supplementary material
Source: ML conference proceedings conference paper supplement (https://openaccess.thecvf.com/content/WACV2025/html/Xu_LLaVA-SpaceSGG_Visual_Instruct_WACV_2025_paper.html)
Supplement: Supplementary file 1 [file Xu_LLaVA-SpaceSGG_Visual_Instruct_WACV_2025_supplemental.pdf]

# LLaVA-SpaceSGG: Visual Instruct Tuning for Open-vocabulary Scene Graph Generation with Enhanced Spatial Relations

## WACV2025 Supplementary Material

Mingjie Xu<sup>1\*</sup>, Mengyang Wu<sup>2\*</sup>, Yuzhi Zhao<sup>3†</sup>, Jason Chun Lok Li<sup>4</sup>, Weifeng Ou<sup>5</sup>

parasolohalo@gmail.com, yzzhao2-c@my.cityu.edu.hk

<sup>1</sup>Independent Researcher   <sup>2</sup>The Chinese University of Hong Kong   <sup>3</sup>City University of Hong Kong  
<sup>4</sup>The University of Hong Kong   <sup>5</sup>Dongguan University of Technology

|                                               | Stage 1<br>Pretraining<br>Phase | Stage 1<br>Instruction-<br>tuning Phase | Stage 2<br>Pretraining Phase            | Stage 2<br>Instruction-tuning Phase                             |
|-----------------------------------------------|---------------------------------|-----------------------------------------|-----------------------------------------|-----------------------------------------------------------------|
| LLaVA-SpaceSGG                                | CC3M (595K)                     | LLaVA-Instruct (665K)                   | CC12M (5M)<br>AS-1B (10M)<br>GRIT (15M) | AS-V2 (127K),<br>SpaceSGG (40K)<br>(Desc 10K, QA 10K, Conv 20K) |
| <b>Ablations on Placebo Data Combinations</b> |                                 |                                         |                                         |                                                                 |
| LLaVA-SpaceSGG -ab-data-6                     | CC3M (595K)                     | LLaVA-Instruct (665K)                   | CC12M (5M)<br>AS-1B (10M)<br>GRIT (15M) | AS-V2 (127K),<br>LLaVA-Instruct (10K) (Desc 10K)                |
| LLaVA-SpaceSGG -ab-data-7                     | CC3M (595K)                     | LLaVA-Instruct (665K)                   | CC12M (5M)<br>AS-1B (10M)<br>GRIT (15M) | AS-V2 (127K),<br>LLaVA-Instruct 10K (QA 10K)                    |
| LLaVA-SpaceSGG -ab-data-8                     | CC3M (595K)                     | LLaVA-Instruct (665K)                   | CC12M (5M)<br>AS-1B (10M)<br>GRIT (15M) | AS-V2 (127K),<br>LLaVA-Instruct (Conv 20K)                      |
| LLaVA-SpaceSGG -ab-data-9                     | CC3M (595K)                     | LLaVA-Instruct (665K)                   | CC12M (5M)<br>AS-1B (10M)<br>GRIT (15M) | AS-V2 (127K),<br>LLaVA-Instruct 20K (Desc 10K, QA 10K)          |
| LLaVA-SpaceSGG -ab-data-10                    | CC3M (595K)                     | LLaVA-Instruct (665K)                   | CC12M (5M)<br>AS-1B (10M)<br>GRIT (15M) | AS-V2 (127K),<br>LLaVA-Instruct 30K (Desc 10K, Conv 20K)        |
| LLaVA-SpaceSGG -ab-data-11                    | CC3M (595K)                     | LLaVA-Instruct (665K)                   | CC12M (5M)<br>AS-1B (10M)<br>GRIT (15M) | AS-V2 (127K),<br>LLaVA-Instruct 30K (QA 10K, Conv 20K)          |

**Legend**

**Dataset**

- SpaceSGG
- AS-V2

**Training stages**

- Stage 1 Pretraining Phase
- Stage 1 Instruction-tuning Phase
- Stage 2 Pretraining Phase
- Stage 2 Instruction-tuning Phase
- Stage 3 Instruction-tuning Phase

Figure 1. We conduct placebo ablation studies by testing the same data combination, replacing components in SpaceSGG with equivalent ones from the LLaVA-Instruct dataset.

The supplementary material contains (1) more ablation studies testing effectiveness of the proposed dataset; (2) more examples about the SpaceSGG dataset including 3 components (SpaceSGG-Desc, SpaceSGG-QA and SpaceSGG-Conv); (3) more visual examples about our proposed LLaVA-SpaceSGG prediction compare with other models (TextPSG, ASmv2).

### 1. A. More Ablation Studies

To further validate the effectiveness of the proposed dataset, we replaced each element with equivalent components from the LLaVA-Instruct dataset, ensuring the same number of entries were sampled. The experimental settings are illustrated in Figure 1. As shown in Table 1, these replacements did not improve the model’s SGG performance or spatial understanding, further highlighting the significance of our dataset.

| Ablation Setting           | Recall | mRecall | Accuracy (%) |
|----------------------------|--------|---------|--------------|
| LLaVA-SpaceSGG -ab-data-6  | 9.49   | 8.18    | 30.415       |
| LLaVA-SpaceSGG -ab-data-7  | 14.95  | 11.74   | 51.775       |
| LLaVA-SpaceSGG -ab-data-8  | 13.2   | 8.44    | 51.8         |
| LLaVA-SpaceSGG -ab-data-9  | 0      | 0       | 0            |
| LLaVA-SpaceSGG -ab-data-10 | 0      | 0       | 26.895       |
| LLaVA-SpaceSGG -ab-data-11 | 13.07  | 8.66    | 39.075       |
| LLaVA-SpaceSGG             | 15.43  | 13.23   | 52.48        |

Table 1. We experimented with different mixing ratios of replaced placebo data, using refabricated data combinations for the experimental settings. The red, blue, and green colors denote the best, the second highest and the third highest results, respectively. For detailed experimental settings, please refer to Figure 1.

### 2. B. SpaceSGG dataset examples

We provide three types examples of SpaceSGG data, see in Figure 2, Figure 3 and Figure 4.

### 3. C. PSG Dataset Evaluation Comparison

We report more visual evaluation results of LLaVA-SpaceSGG compared with ASmv2 and TextPSG, see in Figure 5.

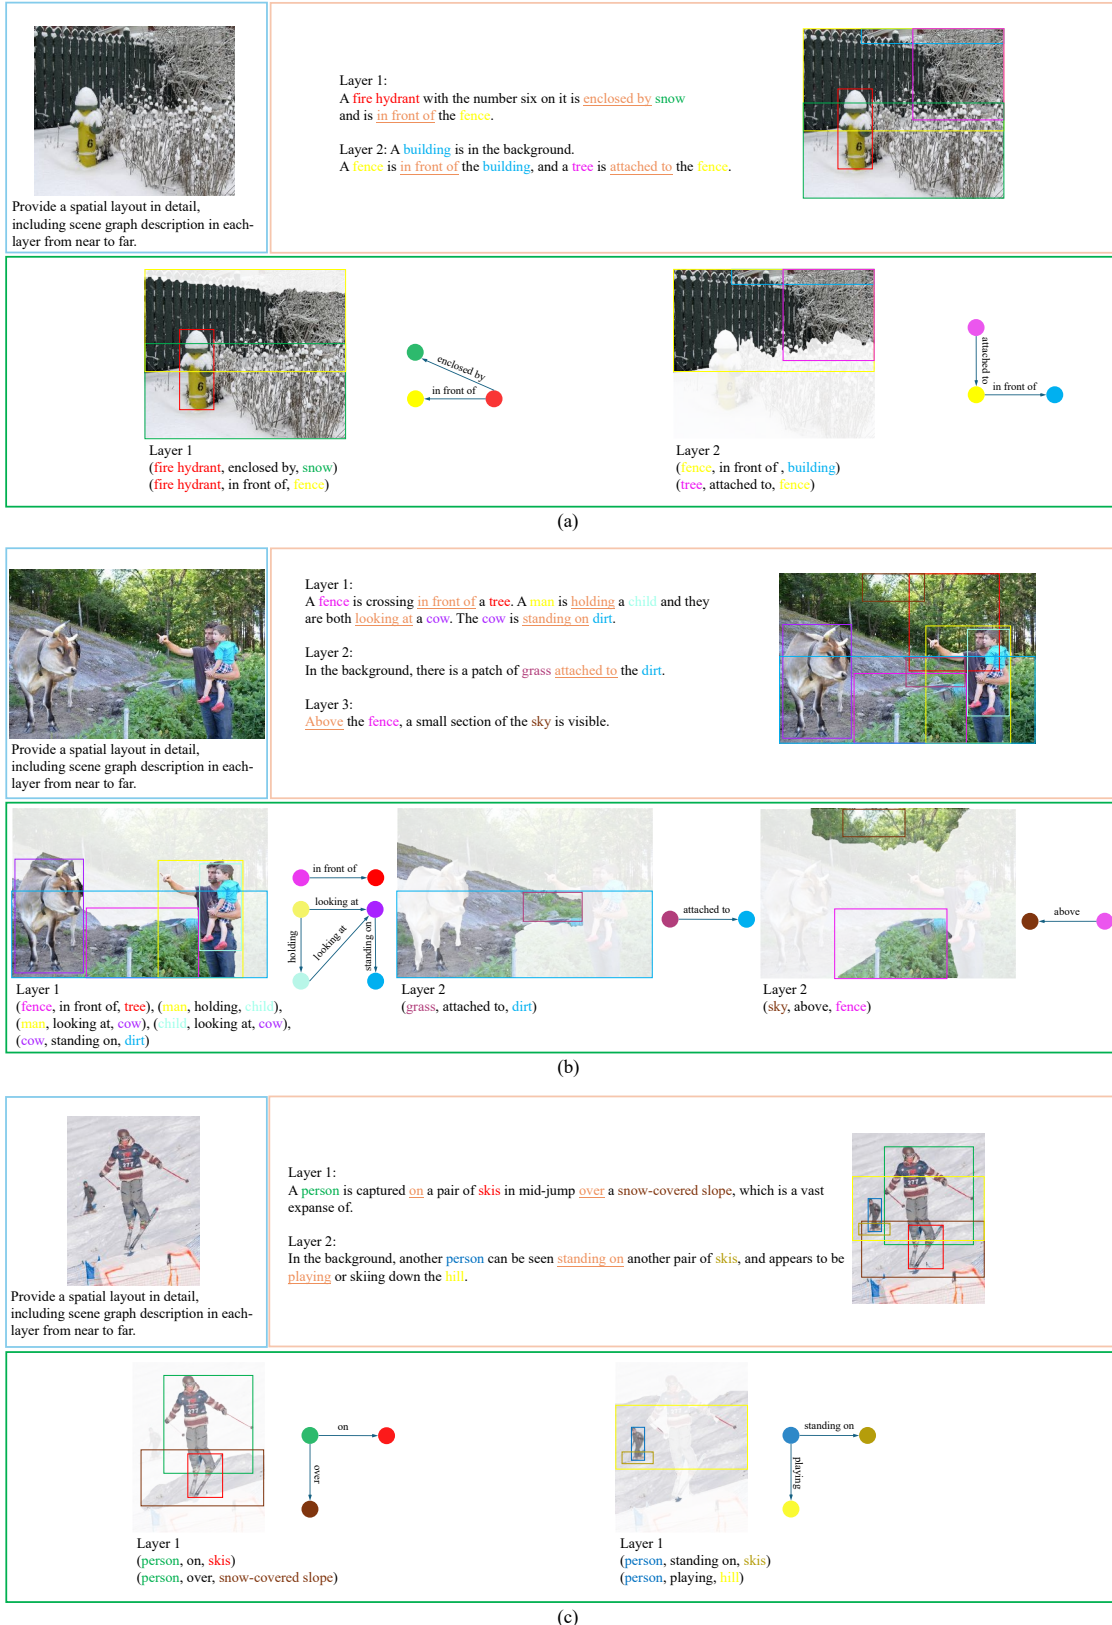

Figure 2. Data Examples of SpaceSGG-Desc in SpaceSGG.



Q: Is the **building** closer to the camera than the **fire hydrant**?  
 A: No, the **fire hydrant** is closer to the camera than the **building**.

Q: Is the **tree** to the left of the **fence**?  
 A: No, the **tree** is attached to the **fence**.

Q: Is the **fire hydrant** in front of the **tree**?  
 A: No, the **fire hydrant** is in front of the **tree**.


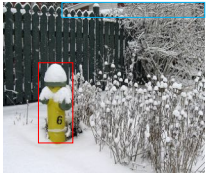

(fire hydrant, in front of, building)



(tree, attached to, fence)



(fire hydrant, in front of, tree)

- in front of ●
- attached to ●
- in front of ●

(a)



Q: Is the **fence** in front of the **tree**?  
 A: Yes, the **fence** is in front of the **tree**.

Q: Is the **man** closer to the **cow** than the **fence**?  
 A: Yes, the **man** is closer to the **cow** than the **fence**.

Q: Is the **grass** farther away from the camera than the **man**?  
 A: Yes, the **grass** is farther away from the camera than the **man**.




(fence, in front of, tree)



(man is closer to the cow than the fence)



(man, in front of, grass)

- in front of ●
- in front of ●

(b)

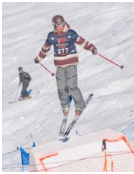

Q: Is the **person** closer to the camera than the **person**?  
 A: Yes, the **person** is closer to the camera than the **person**.

Q: Is the **skis** in front of the **skis**?  
 A: No, **skis** in front of the **skis**.

Q: Is the **snow** in larger than the **skis**?  
 A: Yes, the **snow** is larger than the **skis**.




(person, in front of, person)



(skis, in front of, skis)



(snow, larger than, skis)

- in front of ●
- in front of ●
- larger than ●

(c)

Figure 3. Data Examples of SpaceSGG-QA in SpaceSGG.

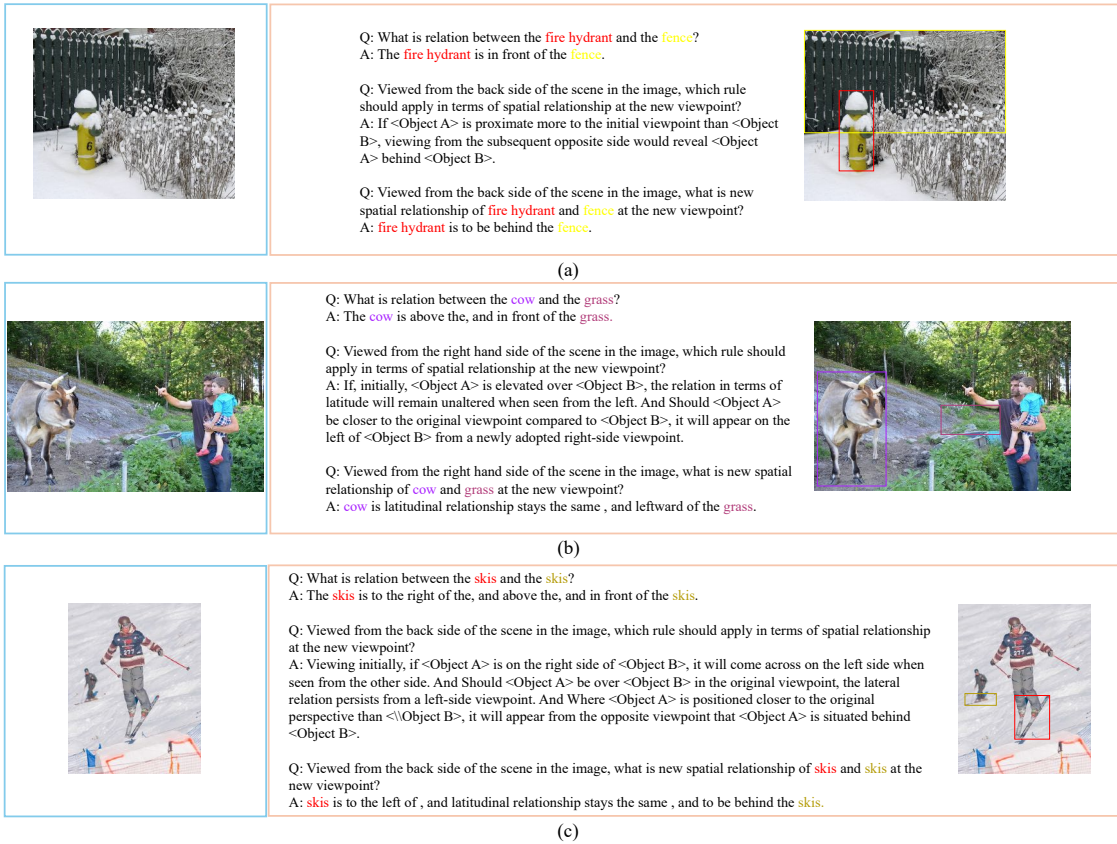

Figure 4. Data Examples of SpaceSGG-Conv in SpaceSGG.



house : object labels ("house" as an example)    
  : object location ("house" as an example)    
 in front of : front-back predicate ("in front of" as an example)    
 beside : ordinary predicate ("beside" as an example)

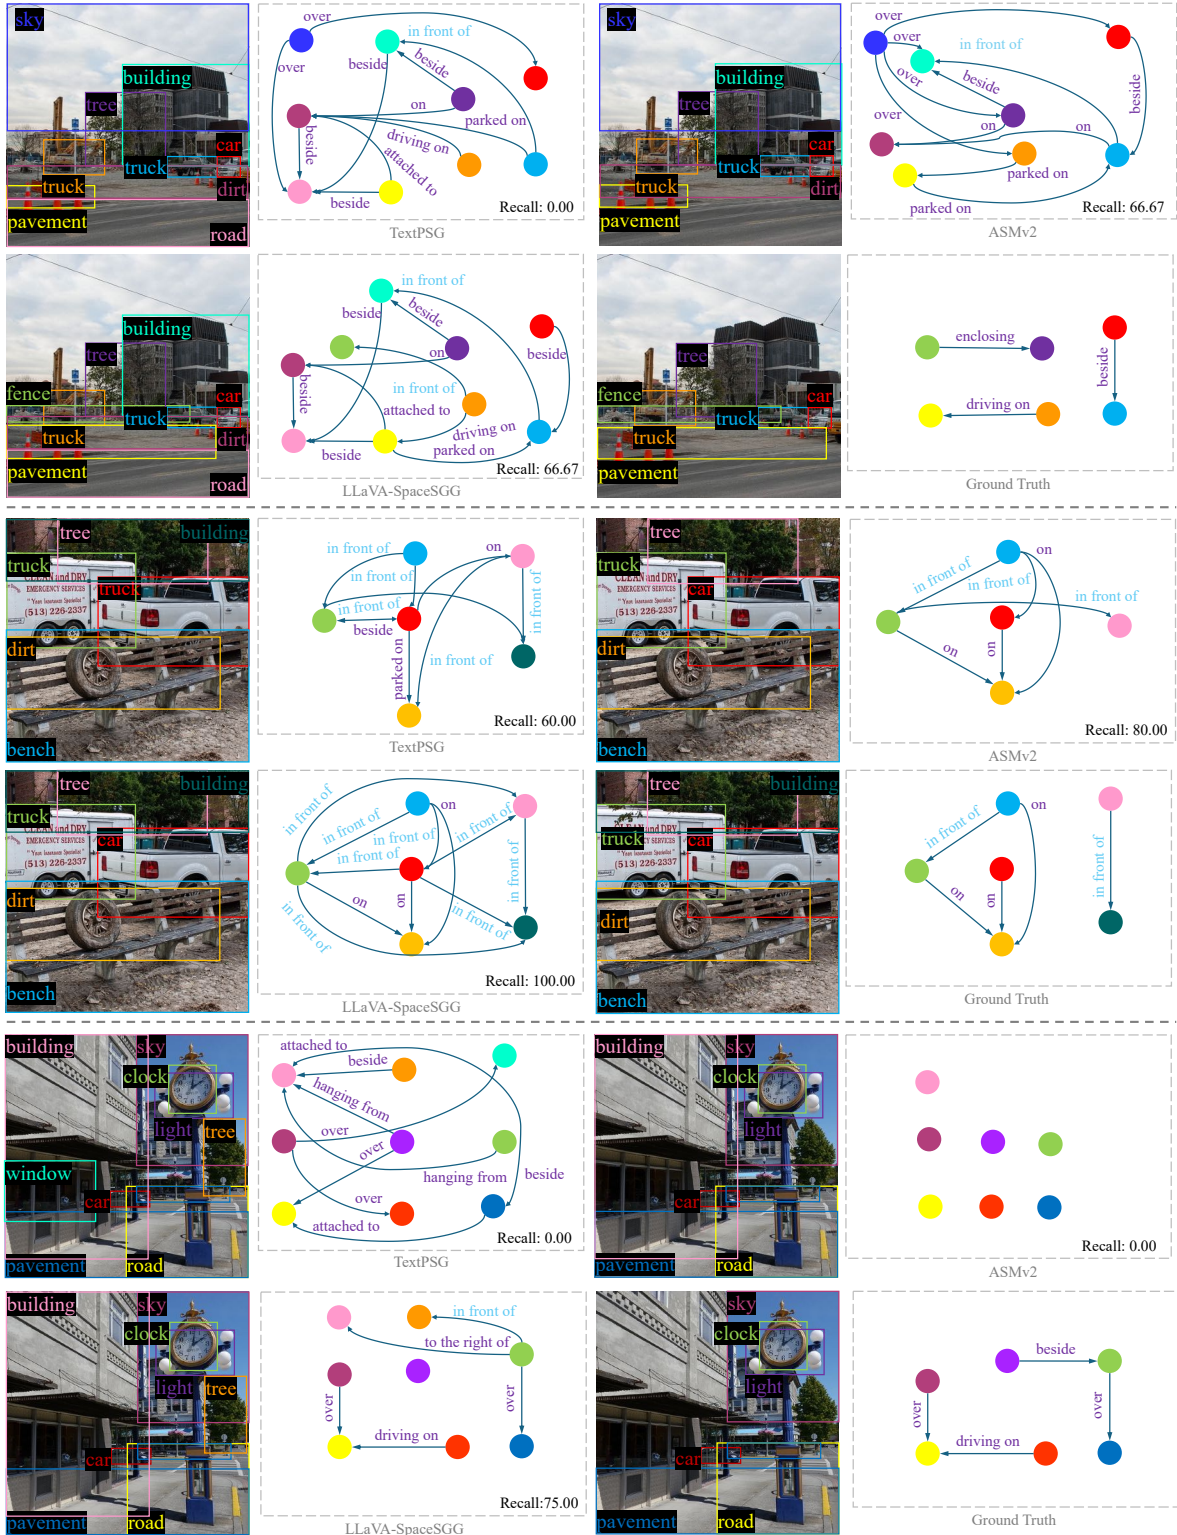

Figure 5. Additional examples of LLaVA-SpaceSGG Open-Vocabulary SGG prediction compared with others on PSG validation set.
